# Supplementary material
Source: PubMed Central journal article supplement (PMC1200587)
Supplement: bmj_331_7516_544__1.pdf [file bmj_331_7516_544__1.pdf]

## **Affiliations of UKATT Research Team members**

**Institute of Medical and Social Care Research, University of Wales Bangor, Gwynedd, LL57 2UW**

Ian Russell  
*director*

**School of Psychology, University of Birmingham, Birmingham B15 2TT**

Jim Orford  
*professor of clinical and community psychology*

**Centre for Psychology, University of Wales Institute Cardiff**

Tina Alwyn  
*lecturer*

**School of Psychology, University of Exeter**

Rachel Black  
*trainee clinical psychologist*

**Substance Misuse Services, Birmingham and Solihull Mental Health NHS Trust**

Alex Copello  
*clinical director*

**Department of Health Sciences, University of York**

Simon Coulton  
*research fellow*

Amanda Farrin  
*research fellow*

Christine Godfrey  
*professor of health economics*

Veronica Morton  
*research fellow*

**Leeds Addiction Unit, Leeds Mental Health NHS Trust**

Olwyn Finnegan  
*research fellow*

Linda Handforth  
*research fellow*

Wendy Middleton  
*research fellow*

Duncan Raistrick  
*director*

Gill Thistlethwaite  
*research fellow*

Gillian Tober  
*deputy clinical director*

Alison Westwood  
*research fellow*

**Sheffield Institute for Studies on Ageing, Northern General Hospital, Sheffield**

Kate Fryer  
*research fellow*

**School of Psychology and Sport Sciences, Northumbria University**

Nick Heather  
*emeritus professor*

**Alcohol Education and Research Council, London**

Ray Hodgson  
*director*

**Centre for Interprofessional Studies, University of Wales Institute Cardiff**

Bev John  
*lecturer*

**Department of Primary Care and Population Sciences, Royal Free and University College Medical School, University College London**

Cicely Kerr  
*research fellow*

**Centre for Health Economics, University of York**

Steve Parrott  
*research fellow*

**North Wales Section of Psychological Medicine, Institute of Medical and Social Care Research, University of Wales Bangor**

Gary Slegg  
*research fellow*

**Academic Division of Clinical Psychology, University of Manchester**

Melanie Smith  
*trainee clinical psychologist*

### **Collaborators**

Alan Atkinson, Clive Barrett, and Robert Kenyon (Leeds Addiction Unit, Leeds Mental Health NHS Trust)

Pauline Chalk (North Birmingham Community Alcohol Team)

Jeff Champney-Smith and Andrew McBride (Cardiff Community Addiction Unit)

Illana Crome and Sue Parkes (Community Alcohol Team Addiction Services, Wolverhampton)

Rhoda Emlyn-Jones (Cardiff Community Alcohol Team)

Annette Fleming (Aquarius Action Projects, Birmingham)

Ash Kahn (North Birmingham Mental Health Trust)

Zelda Summers and Paul Williams (Community Drug and Alcohol Team, Mid-Glamorgan)

Public sector resource costs before and after randomisation by allocated treatment

| Period of estimation                                 |                    | Average number of units (SD) consumed in: |                                              |                              |                                              |  |  |
|------------------------------------------------------|--------------------|-------------------------------------------|----------------------------------------------|------------------------------|----------------------------------------------|--|--|
|                                                      |                    | Six months before randomisation           |                                              |                              | Six months before follow up                  |  |  |
| Resource                                             | Costs per unit     | Motivational therapy (n=347)              | Social behaviour and network therapy (n=261) | Motivational therapy (n=347) | Social behaviour and network therapy (n=261) |  |  |
| <b>Hospital</b>                                      |                    |                                           |                                              |                              |                                              |  |  |
| Inpatient <sup>10</sup>                              | £242 / night       | 2.69 (6.85)                               | 2.93 (6.68)                                  | 2.14 (10.46)                 | 2.05 (8.89)                                  |  |  |
| Ambulance for inpatient <sup>10</sup>                | £188 / journey     | 0.147 (0.435)                             | 0.146 (0.441)                                | 0.089 (0.389)                | 0.107 (0.387)                                |  |  |
| Patient Travel Service for inpatient <sup>10</sup>   | £39 / journey      | 0.006 (0.076)                             | 0.019 (0.137)                                | 0.029 (0.199)                | 0.034 (0.203)                                |  |  |
| Day patient <sup>10</sup>                            | £77 / visit        | 0.037 (0.205)                             | 0.019 (0.163)                                | 0.029 (0.168)                | 0.027 (0.162)                                |  |  |
| Ambulance for day patient <sup>10</sup>              | £188 / journey     | 0.000 (0.000)                             | 0.000 (0.000)                                | 0.000 (0.000)                | 0.008 (0.087)                                |  |  |
| Patient Travel Service for day patient <sup>10</sup> | £39 / journey      | 0.000 (0.000)                             | 0.000 (0.000)                                | 0.000 (0.000)                | 0.008 (0.087)                                |  |  |
| Outpatient <sup>10</sup>                             | £74 / appointment  | 0.308 (0.697)                             | 0.368 (0.761)                                | 0.308 (0.721)                | 0.272 (0.690)                                |  |  |
| Ambulance for outpatient <sup>10</sup>               | £188 / journey     | 0.009 (0.093)                             | 0.011 (0.107)                                | 0.012 (0.131)                | 0.027 (0.269)                                |  |  |
| Patient Travel Service for outpatient <sup>10</sup>  | £39 / journey      | 0.009 (0.093)                             | 0.011 (0.107)                                | 0.006 (0.107)                | 0.023 (0.262)                                |  |  |
| Accident & Emergency Dept (AED) <sup>10</sup>        | £61 / visit        | 0.550 (0.829)                             | 0.502 (0.807)                                | 0.280 (0.609)                | 0.33 (0.712)                                 |  |  |
| Ambulance to AED <sup>10</sup>                       | £188 / journey     | 0.308 (0.654)                             | 0.314 (0.639)                                | 0.170 (0.490)                | 0.207 (0.544)                                |  |  |
| Patient Travel Service to AED <sup>10</sup>          | £39 / journey      | 0.020 (0.160)                             | 0.008 (0.087)                                | 0.009 (0.093)                | 0.038 (0.245)                                |  |  |
| <b>Primary care</b>                                  |                    |                                           |                                              |                              |                                              |  |  |
| General Practitioner – home <sup>10</sup>            | £59 / visit        | 0.124 (0.449)                             | 0.153 (0.464)                                | 0.124 (0.653)                | 0.119 (0.979)                                |  |  |
| General Practitioner – surgery <sup>10</sup>         | £19 / consultation | 4.06 (4.46)                               | 3.75 (4.16)                                  | 2.89 (3.37)                  | 3.78 (5.22)                                  |  |  |
| Prescription <sup>9</sup>                            | £19 / prescription | 11.6 (18.0)                               | 12.4 (17.9)                                  | 11.7 (19.8)                  | 11.7 (21.9)                                  |  |  |
| Practice nurse – surgery <sup>10</sup>               | £10 / consultation | 0.602 (1.29)                              | 0.506 (1.30)                                 | 0.317 (1.08)                 | 0.479 (1.69)                                 |  |  |
| <b>Social care</b>                                   |                    |                                           |                                              |                              |                                              |  |  |
| Social worker <sup>10</sup>                          | £43 / home visit   | 0.383 (2.18)                              | 0.904 (6.17)                                 | 0.176 (1.03)                 | 0.644 (3.63)                                 |  |  |
| Community Psychiatric Nurse <sup>10</sup>            | £27 / home visit   | 0.614 (2.42)                              | 0.958 (3.35)                                 | 0.380 (2.44)                 | 0.464 (2.78)                                 |  |  |
| District nurse <sup>10</sup>                         | £20 / home visit   | 0.055 (0.725)                             | 0.084 (0.965)                                | 0.167 (1.98)                 | 0.241 (1.16)                                 |  |  |
| Occupational therapist <sup>10</sup>                 | £16 / home visit   | 0.058 (0.719)                             | 0.034 (0.396)                                | 0.020 (0.279)                | 0.103 (1.50)                                 |  |  |
| Support worker <sup>10</sup>                         | £10 / consultation | 0.444 (3.27)                              | 0.747 (5.61)                                 | 0.461 (3.08)                 | 0.835 (5.64)                                 |  |  |

|                                                    |                    |               |               |               |               |
|----------------------------------------------------|--------------------|---------------|---------------|---------------|---------------|
| Benefits advisor <sup>10</sup>                     | £7 / consultation  | 0.317 (1.09)  | 0.467 (1.65)  | 0.248 (1.30)  | 0.241 (1.16)  |
| Debt / legal advisor <sup>10</sup>                 | £7 / consultation  | 0.620 (2.67)  | 0.421 (1.39)  | 0.308 (2.28)  | 0.287 (1.20)  |
| Employment advisor <sup>10</sup>                   | £7 / consultation  | 0.150 (0.650) | 0.123 (1.28)  | 0.121 (0.998) | 0.226 (1.66)  |
| Other services <sup>9</sup>                        | £7 / consultation  | 0.424 (1.80)  | 0.828 (5.45)  | 0.438 (3.65)  | 0.303 (2.320) |
| <b>Alcohol services</b>                            |                    |               |               |               |               |
| Primary care – detoxification <sup>2</sup>         | £350 / episode     | 0.164 (0.712) | 0.180 (0.658) | 0.058 (0.465) | 0.042 (0.395) |
| Hospital inpatient – detoxification <sup>10</sup>  | £147 / night       | 1.33 (5.58)   | 2.12 (5.68)   | 0.303 (1.92)  | 0.739 (3.78)  |
| Hospital inpatient – rehabilitation <sup>10</sup>  | £89 / night        | 0.288 (2.82)  | 0.387 (2.70)  | 0.510 (4.95)  | 0.923 (8.04)  |
| Alcohol agency – rehabilitation <sup>10</sup>      | £89 / night        | 0.320 (4.18)  | 0.238 (2.28)  | 0.133 (0.973) | 0.103 (0.977) |
| Other agency – rehabilitation <sup>10</sup>        | £89 / night        | 0.058 (0.792) | 0.000 (0.000) | 0.000 (0.000) | 0.000 (0.000) |
| Hospital outpatient – consultation <sup>10</sup>   | £74 / appointment  | 0.372 (3.46)  | 0.307 (2.03)  | 0.161 (1.11)  | 0.119 (1.11)  |
| Alcohol agency – consultation*                     | £28 / appointment  | 1.83 (2.56)   | 1.85 (2.37)   | 1.03 (9.90)   | 1.33 (7.61)   |
| Other agency – consultation*                       | £28 / appointment  | 0.625 (2.76)  | 0.743 (5.99)  | 0.683 (4.45)  | 0.989 (7.81)  |
| General Practitioner – counselling <sup>10</sup>   | £19 / consultation | 0.009 (0.120) | 0.046 (0.625) | 0.052 (0.327) | 0.027 (0.239) |
| General Practitioner – other alcohol <sup>10</sup> | £19 / consultation | 0.597 (1.41)  | 0.556 (1.18)  | 0.167 (1.06)  | 0.042 (0.395) |
| Counsellor or nurse in primary care <sup>10</sup>  | £14 / consultation | 0.017 (0.169) | 0.153 (1.68)  | 0.020 (0.289) | 0.031 (0.289) |
| <b>Criminal justice</b>                            |                    |               |               |               |               |
| Crown court <sup>11</sup>                          | £8824 / appearance | 0.017 (0.131) | 0.027 (0.162) | 0.020 (0.140) | 0.011 (0.107) |
| Arrests <sup>12,13</sup>                           | £1353 / arrest     | 0.170 (0.472) | 0.192 (0.482) | 0.043 (0.254) | 0.065 (0.304) |
| Magistrates court <sup>11</sup>                    | £564 / appearance  | 0.210 (0.756) | 0.284 (0.792) | 0.167 (1.02)  | 0.162 (0.738) |
| Probation officer <sup>12,13</sup>                 | £46 / contact      | 0.383 (2.71)  | 0.287 (1.53)  | 0.432 (2.42)  | 0.442 (2.31)  |

\* Estimated from UKATT data (excluding training costs)
